# Supplementary material for: Microsatellite instability test using peptide nucleic acid probe-mediated melting point analysis: a comparison study
Source: PubMed Central journal article supplement (PMC6280403; doi:10.1186/s12885-018-5127-6), 2018-12-04
Supplement: 12885_2018_5127_MOESM3_ESM.pdf [file 12885_2018_5127_MOESM3_ESM.pdf]

**Supplementary Table S2** Sensitivity of MNR and PNA method

| Variant (%) | MNR method  |             |             |              |              | Result    |
|-------------|-------------|-------------|-------------|--------------|--------------|-----------|
|             | <i>NR21</i> | <i>NR24</i> | <i>NR27</i> | <i>BAT25</i> | <i>BAT26</i> | MSS/MSI-H |
| 5%          | —           | —           | —           | —            | —            | MSS       |
| 10%         | ○           | —           | ○           | —            | —            | MSI-H     |
| 20%         | ○           | ○           | ○           | ○            | ○            | MSI-H     |
| 40%         | ○           | ○           | ○           | ○            | ○            | MSI-H     |
| 100%        | ○           | ○           | ○           | ○            | ○            | MSI-H     |
| Variant (%) | PNA method  |             |             |              |              | Result    |
|             | <i>NR21</i> | <i>NR24</i> | <i>NR27</i> | <i>BAT25</i> | <i>BAT26</i> | MSS/MSI-H |
| 1%          | ○           | —           | —           | ○            | —            | MSI-H     |
| 5%          | ○           | ○           | ○           | ○            | ○            | MSI-H     |
| 10%         | ○           | ○           | ○           | ○            | ○            | MSI-H     |
| 20%         | ○           | ○           | ○           | ○            | ○            | MSI-H     |
| 100%        | ○           | ○           | ○           | ○            | ○            | MSI-H     |

**Supplementary Table S3** MSI-H detection rate for each marker used in PNA and MNR method

| Marker       | PNA method (n = 76) |                    | MNR method (n = 76) |                    | p-value* |
|--------------|---------------------|--------------------|---------------------|--------------------|----------|
|              | Number of samples   | Detection rate (%) | Number of samples   | Detection rate (%) |          |
| <b>NR21</b>  | 74                  | 97.37%             | 71                  | 93.42%             | 0.375    |
| <b>NR24</b>  | 71                  | 93.42%             | 64                  | 84.21%             | 0.039    |
| <b>BAT26</b> | 71                  | 93.42%             | 63                  | 82.89%             | 0.077    |
| <b>BAT25</b> | 72                  | 94.74%             | 72                  | 94.74%             | 1        |
| <b>NR27</b>  | 75                  | 98.78%             | 74                  | 97.37%             | 1        |

\* McNemar analysis was used to compare two different test results in the same cases.

**Supplementary Table S4** Clinicopathologic characteristics of 76 MSI-H CRC patients and 90 MSS CRC patients

| Clinicopathologic factor | Classification             | MSI-H (n=76) |       | MSS (n=90)  |       | p-value* |
|--------------------------|----------------------------|--------------|-------|-------------|-------|----------|
| Age, years               |                            | 54.39±15.11  |       | 61.16±12.61 |       | 0.002    |
| Gender                   | Female                     | 26           | 34.2% | 34          | 37.8% | 0.634    |
|                          | Male                       | 50           | 65.8% | 56          | 62.2% |          |
| Location                 | Right side                 | 53           | 69.7% | 25          | 27.8% | <0.01    |
|                          | Left side                  | 23           | 30.3% | 65          | 72.2% |          |
| Pre OP CEA               | ≤5ng/ml                    | 68           | 89.5% | 61          | 67.8% | 0.001    |
|                          | >5ng/ml                    | 8            | 10.5% | 29          | 32.2% |          |
| Gross type               | Non-exophytic              | 18           | 23.7% | 35          | 38.9% | 0.036    |
|                          | Exophytic                  | 58           | 76.3% | 55          | 61.1% |          |
| Size (cm)                |                            | 6.13±2.8     |       | 4.43±2.05   |       | <0.001   |
| Histologic diagnosis     | Adenocarcinoma             | 63           | 82.9% | 84          | 93.3% | 0.031    |
|                          | Mucinous adenocarcinoma    | 11           | 14.5% | 5           | 5.6%  |          |
|                          | Signet ring cell carcinoma | 2            | 2.6%  | 0           | 0.0%  |          |
|                          | Neuroendocrine carcinoma   | 0            | 0.0%  | 1           | 1.2%  |          |
| T stage                  | pT1                        | 2            | 2.6%  | 10          | 11.1% | 0.002    |
|                          | pT2                        | 13           | 17.1% | 13          | 14.4% |          |
|                          | pT3                        | 57           | 75.0% | 48          | 53.3% |          |
|                          | pT4a and pT4b              | 4            | 5.3%  | 19          | 21.1% |          |

\* Fisher's exact test and Mann-Whitney test were used for the statistical analysis of categorical variables and continuous variables, respectively.

**Supplementary Table S5** Clinicopathologic characteristics of patients with MSI-H CRCs associated with sporadic conditions or Lynch syndrome

| Clinicopathologic factor      | Classification             | MSI-H CRCs associated with sporadic condition (n=67) |       | MSI-H CRCs associated with Lynch syndrome (n=9) |       | p-value* |
|-------------------------------|----------------------------|------------------------------------------------------|-------|-------------------------------------------------|-------|----------|
| Age, years                    |                            | 56.50±14.37                                          |       | 38.66±11.10                                     |       | 0.001    |
| Gender                        | Female                     | 24                                                   | 35.8% | 2                                               | 22.2% | 0.488    |
|                               | Male                       | 43                                                   | 64.2% | 7                                               | 77.8% |          |
| Location                      | Right side                 | 49                                                   | 73.1% | 4                                               | 44.4% | 0.119    |
|                               | Left side                  | 18                                                   | 26.9% | 5                                               | 55.6% |          |
| Pre OP CEA                    | ≤5ng/ml                    | 59                                                   | 88.1% | 8                                               | 88.9% | 1        |
|                               | >5ng/ml                    | 8                                                    | 11.9% | 1                                               | 11.1% |          |
| Gross type                    | Non-exophytic              | 16                                                   | 23.9% | 2                                               | 22.2% | 1        |
|                               | Exophytic                  | 51                                                   | 76.1% | 7                                               | 77.8% |          |
| Size                          |                            | 6.36±2.80                                            |       | 4.34±2.12                                       |       | 0.041    |
| Histologic diagnosis          | Adenocarcinoma             | 56                                                   | 83.6% | 7                                               | 77.8% | 0.321    |
|                               | Mucinous carcinoma         | 10                                                   | 14.9% | 1                                               | 11.1% |          |
|                               | Signet ring cell carcinoma | 1                                                    | 1.5%  | 1                                               | 11.1% |          |
| T stage                       | pT1                        | 2                                                    | 3.0%  | 0                                               | 0.0%  | 0.644    |
|                               | pT2                        | 11                                                   | 16.4% | 2                                               | 22.2% |          |
|                               | pT3                        | 50                                                   | 74.6% | 7                                               | 77.8% |          |
|                               | pT4a and pT4b              | 4                                                    | 6.0%  | 0                                               | 0.0%  |          |
| Lymphovascular invasion       | Absent                     | 50                                                   | 75.8% | 6                                               | 66.7% | 0.684    |
|                               | Present                    | 16                                                   | 24.2% | 3                                               | 33.3% |          |
| Mucin formation               | Absent                     | 27                                                   | 40.9% | 5                                               | 42.7% | 0.789    |
|                               | Focal                      | 30                                                   | 45.5% | 3                                               | 44.0% |          |
|                               | Predominant                | 9                                                    | 13.6% | 1                                               | 13.3% |          |
| Invasion pattern              | Expanding                  | 36                                                   | 55.4% | 4                                               | 44.4% | 0.724    |
|                               | Infiltrative               | 29                                                   | 44.6% | 5                                               | 55.6% |          |
| Crohn-like reaction           | Absent                     | 25                                                   | 38.5% | 2                                               | 22.2% | 0.472    |
|                               | Present                    | 40                                                   | 61.5% | 7                                               | 77.8% |          |
| Tumor budding                 | Absent                     | 63                                                   | 96.9% | 8                                               | 88.9% | 0.326    |
|                               | Present                    | 2                                                    | 3.1%  | 1                                               | 11.1% |          |
| MMR protein expression by IHC | MLH1/PMS2 loss             | 42                                                   | 62.7% | 7                                               | 77.8% | 1        |
|                               | MSH2/MSH6 loss             | 15                                                   | 22.4% | 2                                               | 22.2% |          |
|                               | PMS2 loss                  | 1                                                    | 1.5%  | 0                                               | 0.0%  |          |
|                               | MSH6 loss                  | 5                                                    | 7.5%  | 0                                               | 0.0%  |          |
|                               | MLH1/PMS2/MSH2/MSH6 loss   | 1                                                    | 1.5%  | 0                                               | 0.0%  |          |
|                               | MLH1/MSH2/MSH6 loss        | 1                                                    | 1.5%  | 0                                               | 0.0%  |          |

|                                       |                     |    |        |   |        |       |
|---------------------------------------|---------------------|----|--------|---|--------|-------|
|                                       | MLH1/PMS2/MSH6 loss | 1  | 1.5%   | 0 | 0.0%   |       |
|                                       | No loss             | 1  | 1.5%   | 0 | 0.0%   |       |
| Instabililty of MSI makers in PNA-PCR | NR21                | 65 | 97.00% | 8 | 88.90% | 0.319 |
|                                       | NR24                | 63 | 94.00% | 9 | 100%   | 1     |
|                                       | BAT26               | 62 | 92.50% | 9 | 100%   | 1     |
|                                       | BAT25               | 64 | 95.50% | 9 | 100%   | 1     |
|                                       | NR27                | 66 | 98.50% | 9 | 100%   | 1     |
| Instabililty of MSI makers in PCR-MNR | NR21                | 63 | 94.00% | 9 | 100%   | 1     |
|                                       | NR24                | 55 | 82.10% | 8 | 88.90% | 1     |
|                                       | BAT26               | 54 | 80.60% | 9 | 100%   | 0.344 |
|                                       | BAT25               | 63 | 94.00% | 8 | 88.90% | 0.477 |
|                                       | NR27                | 65 | 97.00% | 9 | 100%   | 1     |

\* Fisher's exact test and Mann-Whitney test were used for the statistical analysis of categorical variables and continuous variables, respectively.

**Supplementary Table S6** IHC-mediated MSI-H detection rate depending on the combination of markers and variable cut-off values for loss of MMR protein expression

| Combination of MMR markers        | MSI-H detection rate (n = 76) |                    |                                 |                    |                                 |                    |
|-----------------------------------|-------------------------------|--------------------|---------------------------------|--------------------|---------------------------------|--------------------|
|                                   | Cut off value: complete loss  |                    | Cut off value: $\geq 99\%$ loss |                    | Cut off value: $\geq 95\%$ loss |                    |
|                                   | Number of samples             | Detection rate (%) | Number of samples               | Detection rate (%) | Number of samples               | Detection rate (%) |
| <b>MLH1</b>                       | 50                            | 65.79%             | 50                              | 65.79%             | 51                              | 67.11%             |
| <b>MSH2</b>                       | 15                            | 19.74%             | 15                              | 19.74%             | 19                              | 25.00%             |
| <b>PMS2</b>                       | 48                            | 63.16%             | 51                              | 67.11%             | 52                              | 68.42%             |
| <b>MSH6</b>                       | 8                             | 10.53%             | 17                              | 22.37%             | 25                              | 32.89%             |
| <b>MLH1 and MSH2</b>              | 64                            | 84.21%             | 64                              | 84.21%             | 69                              | 90.79%             |
| <b>PMS2 and MSH6</b>              | 56                            | 73.68%             | 68                              | 89.47%             | 75                              | 98.68%             |
| <b>MLH1, PMS2, MSH2, and MSH6</b> | 69                            | 90.79%             | 73                              | 96.05%             | 75                              | 98.68%             |
